# Supplementary material for: Flying at No Mechanical Energy Cost: Disclosing the Secret of Wandering Albatrosses
Source: PLoS One. 2012 Sep 5;7(9):e41449. doi: 10.1371/journal.pone.0041449 (PMC3434196; doi:10.1371/journal.pone.0041449)
Supplement: Text S1 — Calculation of fuel consumption of a gasoline engine producing the same power as a wandering albatross. (DOCX) [file pone.0041449.s005.docx]

**FUEL CONSUMPTION OF GASOLINE ENGINE PRODUCING THE SAME POWER AS A WANDERING ALBATROSS**

**Energy required by albatross**

Mass:

Drag-to-lift ratio:

Speed:

Energy required for flying:

Thus:

**Gasoline**

Energy: 4.0 107 J/kg

Density: 0.75 kg/dm3

Efficiency: 25 %

Effective gasoline energy per litre:

**Fuel consumption per day**

Thus:
